# Supplementary material
Source: publisher site journal article supplement (https://www.dovepress.com/article/supplementary_file/588794/588794%20Revised%20Appendix.docx)
Supplement: Supplementary file 1 [file 588794%20Revised%20Appendix.docx]

**APPENDIX TABLE 1︱**Comparison of variables according to the quartiles of ACI.

|  | | **Female** | | | | | | | **Male** | | | | | | |  | |
| --- | --- | --- | --- | --- | --- | --- | --- | --- | --- | --- | --- | --- | --- | --- | --- | --- | --- |
| **Variables** | | Q1 (1.38 - 2.32) | | Q2 (2.32 - 2.59) | Q3 (2.59 - 2.80) | Q4 (2.80 - 3.73) | | **P value** | Q1 (1.53 - 2.36) | Q2 (2.36 - 2.63) | | Q3 (2.63 - 2.89) | | Q4 (2.89 - 3.94) | | **p value** | |
| Numbers | | 280 | | 289 | 283 | 294 | |  | 281 | 297 | | 298 | | 301 | |  | |
| Age (years) | | 60.7 ± 9.9 | | 60.4 ± 11.2 | 58.5 ± 12.5 | 57.6 ± 12.5 | | 0.002 | 60.6 ± 11.6 | 57.6 ± 11.9 | | 54.7 ± 12.2 | | 48.9 ± 12.1 | | < 0.001 | |
| Duration of | | 8.0 (3.0 -15.0) | | 6.0 (2.0 - 11.0) | 6.0 (2.0 - 12.0) | 6.0 (1.5 - 10.0) | | 0.001 | 10.0 (3.0 - 15.5) | 6.0 (1.0 - 13.0) | | 5.0 (1.0 - 10.0) | | 4.0 (0.5 - 10.0) | | < 0.001 | |
| diabetes (years) | |
| Smoking (%) | | 0 (0.0%) | | 1 (0.3%) | 2 (0.7%) | 3 (1.0%) | | 0.222 | 85 (30.3%) | 105 (35.4%) | | 121 (40.6%) | | 133 (44.2%) | | 0.004 | |
| Drinking (%) | | 1 (0.4%) | | 0 (0.0%) | 2 (0.7%) | 3 (1.0%) | | 0.216 | 95 (33.8%) | 93 (31.3%) | | 109 (36.6%) | | 125 (41.5%) | | 0.085 | |
| BMI (kg/m2) | | 24.00 ± 3.49 | | 24.90 ± 3.67 | 26.12 ± 3.89 | 26.38 ± 3.46 | | < 0.001 | 24.40 ± 3.03 | 25.48 ± 3.16 | | 26.30 ± 3.35 | | 27.24 ± 3.17 | | < 0.001 | |
| VFA | | 65.00 (44.00 - 89.00) | | 76.00 (59.00 - 97.00) | 88.00 (67.00 - 112.00) | 94.00 (73.00 - 118.25) | | < 0.001 | 79.00 (52.00 - 112.00) | 100.00 (77.00 - 127.00) | | 114.00 (88.75 - 139.00) | | 122.00 (96.50 - 148.00) | | < 0.001 | |
| SFA | 152.00 (116.00 - 200.75) | | 172.00 (133.00 - 216.00) | | 196.00 (145.00 - 247.00) | 200.00 (151.75 - 243.50) | | < 0.001 | 159.00 (114.00 - 193.75) | 180.50 (140.00 - 216.75) | | 190.00 (157.50-238.00) | | 202.00 (165.50 - 251.00) | | < 0.001 | |
| SBP (mmHg) | | 130.6 ± 19.9 | | 130.0 ± 19.3 | 131.4 ± 19.6 | 134.0 ± 19.3 | | 0.063 | 128.2 ± 17.1 | 127.9 ± 18.1 | | 130.1 ± 17.9 | | 130.6 ± 17.3 | | 0.177 | |
| DBP (mmHg) | | 77.5 ± 11.5 | | 78.3 ± 10.1 | 80.2 ± 12.5 | 81.6 ± 10.7 | | < 0.001 | 80.0 ± 10.6 | 81.6 ± 11.8 | | 84.0 ± 12.1 | | 85.0 ± 11.6 | | < 0.001 | |
| TC (mmol/L) | | 4.23 ± 0.96 | | 4.85 ± 1.10 | 5.15 ± 1.09 | 5.78 ± 1.20 | | < 0.001 | 3.83 ± 0.93 | 4.47 ± 0.98 | | 4.75 ± 0.91 | | 5.48 ± 1.24 | | < 0.001 | |
| TG (mmol/L) | | 0.81 (0.68 - 0.97) | | 1.20 (1.04 - 1.41) | 1.59 (1.40 - 1.90) | 2.58 (2.11 - 3.23) | | < 0.001 | 0.78 (0.67 - 0.96) | 1.18 (1.03 - 1.37) | | 1.65 (1.42 - 1.91) | | 3.13 (2.43 - 4.12) | | < 0.001 | |
| HDL-c (mmol/L) | | 1.48 ± 0.29 | | 1.29 ± 0.29 | 1.16 ± 0.23 | 1.05 ± 0.22 | | < 0.001 | 1.28 ± 0.29 | 1.13 ± 0.22 | | 1.00 ± 0.18 | | 0.91 ± 0.20 | | < 0.001 | |
| LDL-c (mmol/L) | | 2.45 ± 0.79 | | 3.10 ± 0.92 | 3.39 ± 0.94 | 3.70 ± 1.09 | | < 0.001 | 2.27 ± 0.79 | 2.93 ± 0.85 | | 3.18 ± 0.85 | | 3.33 ± 1.14 | | **<** 0.001 | |
| FPG (mmol/L) | | 7.74 ± 3.03 | | 8.48 ± 3.27 | 9.06 ± 3.19 | 10.35 ± 4.04 | | < 0.001 | 7.57 ± 2.86 | 8.95 ± 3.27 | | 9.15 ± 3.35 | | 10.24 ± 3.61 | | < 0.001 | |
| HbA1c (%) | | 8.78 ± 2.04 | | 9.15 ± 2.29 | 9.54 ± 2.16 | 10.05 ± 2.14 | | < 0.001 | 8.91 ± 2.18 | 9.39 ± 2.30 | | 9.17 ± 2.15 | | 9.84 ± 2.22 | | < 0.001 | |
| AST (U/L) | | 17.40 (14.40 - 21.95） | | 16.90 (14.00 - 21.20) | 16.30 (13.00 - 21.00) | 16.80 (13.88 - 21.10) | | 0.181 | 18.10 (14.95 - 22.00) | 17.60 (14.80- 20.85) | | 17.50 (14.38- 21.70) | | 18.40 (14.50 - 23.95) | | 0.092 | |
| ALT (U/L) | | 16.45 (12.35 - 22.60) | | 15.90 (12.50 - 23.65) | 16.10 (11.90 - 23.60) | 17.05 (13.00 - 25.13) | | 0.460 | 18.20 (13.70 - 24.90) | 19.20 (14.70 - 26.10) | | 20.00 (14.88 - 30.43) | | 23.00 (16.15 - 35.60) | | < 0.001 | |
| GGT (U/L) | | 15.00 (12.00 - 20.00) | | 17.00 (13.25 - 22.20) | 20.00 (15.00 - 27.00） | 23.70 (18.00 - 34.00) | | < 0.001 | 19.00 (13.00 - 25.00) | 24.00 (18.00 - 33.00) | | 26.00 (19.75 - 38.25) | | 33.40 (25.00 - 49.00) | | < 0.001 | |
| UA (μmolL) | | 229.41 ± 73.69 | | 249.02 ± 85.41 | 272.91 ± 80.49 | 291.71 ± 95.67 | | < 0.001 | 281.13 ± 76.40 | 304.16 ± 80.88 | | 314.26 ± 80.38 | | 354.41 ± 105.02 | | < 0.001 | |
| Scr (μmol/L) | | 55.57 ± 12.22 | | 55.32 ± 13.29 | 57.26 ± 15.06 | 58.98 ± 19.22 | | 0.014 | 70.45 ± 16.01 | 74.86 ± 21.66 | | 74.14 ± 17.57 | | 75.32 ± 21.69 | | 0.011 | |
| Hb (g/L) | | 133.09 ± 22.88 | | 132.66 ± 16.92 | 133.76 ± 17.41 | 134.87 ± 15.64 | | 0.406 | 147.45 ± 15.45 | 149.70 ± 16.04 | | 153.78 ± 15.15 | | 154.81 ± 14.94 | | < 0.001 | |
| Platelet (109/L) | | 240.34 ± 64.73 | | 254.18 ± 66.51 | 262.27 ± 64.75 | 269.48 ± 66.38 | | < 0.001 | 207.83 ± 52.82 | 221.31 ± 49.65 | | 230.44 ± 61.51 | | 233.12 ± 56.76 | | < 0.001 | |
| TG/HDL-c | | 0.57 (0.43 - 0.71) | | 0.94 (0.78 - 1.14) | 1.40 (1.17 - 1.69) | 2.39 (1.92 - 3.27) | < 0.001 | | 0.64 (0.50 - 0.81) | | 1.06 (0.89 - 1.26) | | 1.68 (1.46 - 1.98) | | 3.47 (2.56 - 5.07) | | < 0.001 |
| non-HDL-c | | 2.75 ± 0.79 | | 3.56 ± 0.90 | 3.99 ± 0.94 | 4.73 ± 1.08 | | < 0.001 | 2.54 ± 0.78 | 3.33 ± 0.83 | | 3.75 ± 0.81 | | 4.57 ± 1.15 | | < 0.001 | |
| AIP | | -0.25 ± 0.16 | | -0.02 ± 0.12 | 0.15 ± 0.12 | 0.42 ± 0.19 | | < 0.001 | -0.20 ± 0.16 | 0.03 ± 0.12 | | 0.23 ± 0.11 | | 0.57 ± 0.22 | | < 0.001 | |
| LCI | | 5.85 (4.03 -7.72) | | 13.65 (10.67 - 16.99) | 23.61 (19.13 - 28.58) | 49.97 (38.43 - 68.92) | | < 0.001 | 5.42 (3.66 - 7.38) | 13.57 (10.35 - 16.55) | | 24.82 (19.50 - 30.17) | | 59.44 (41.91 - 88.66) | | < 0.001 | |
| PHR | | 168.74 ± 57.75 | | 206.52 ± 71.33 | 235.02 ± 78.63 | 269.71 ± 95.25 | | < 0.001 | 169.80 ± 58.00 | 203.26 ± 61.56 | | 239.60 ± 78.97 | | 267.40 ± 88.63 | | < 0.001 | |
| CRI-I | | 2.88 ± 0.48 | | 3.80 ± 0.59 | 4.47 ± 0.69 | 5.61 ± 1.13 | | < 0.001 | 3.02 ± 0.60 | 3.97 ± 0.60 | | 4.83 ± 0.76 | | 6.14 ± 1.46 | | < 0.001 | |
| CRI-II | | 1.67 ± 0.48 | | 2.41 ± 0.58 | 2.94 ± 0.70 | 3.55 ± 0.94 | | < 0.001 | 1.80 ± 0.61 | 2.60 ± 0.62 | | 3.24 ± 0.79 | | 3.68 ± 1.15 | | < 0.001 | |
| RC (mmol/L) | | 0.30 (0.14 - 0.44) | | 0.47 (0.31 - 0.61) | 0.59 (0.42 - 0.77) | 0.97 (0.70 - 1.21) | | < 0.001 | 0.22 (0.13 - 0.40) | 0.40 (0.24 - 0.55) | | 0.57 (0.40 - 0.73) | | 1.06 (0.81 - 1.46) | | < 0.001 | |
| non-HDL/HDL-c | | 1.85 (1.53 - 2.20) | | 2.73 (2.38 - 3.19) | 3.41 (3.06 - 3.86) | 4.40 (3.91 - 5.09) | | < 0.001 | 1.97 (1.62 - 2.39) | 2.92 (2.50 -3.34) | | 3.74 (3.30 - 4.24) | | 4.87 (4.15 - 5.81) | | < 0.001 | |
| LDL-c/HDL-c | | 1.66 (1.31 - 2.00) | | 2.36 (1.98 - 2.79) | 2.92 (2.45 - 3.39) | 3.46 (2.95 - 4.04) | | < 0.001 | 1.72 (1.37 - 2.19) | 2.61 (2.15 - 2.98) | | 3.22 (2.64 - 3.61) | | 3.53 (3.02 - 4.17) | | < 0.001 | |
| TC/HDL-c | | 2.85 (2.53 - 3.20) | | 3.73 (3.38 - 4.19) | 4.41 (4.06 - 4.86) | 5.40 (4.91 - 6.09) | | < 0.001 | 2.97 (2.62 - 3.39) | 3.92 (3.50 - 4.34) | | 4.74 (4.30 -5.24) | | 5.87 (5.15 - 6.81) | | < 0.001 | |
| RC/HDL-c | | 0.21 (0.09 - 0.31) | | 0.40 (0.23 - 0.50) | 0.51 (0.36 - 0.70) | 0.91 (0.63 - 1.23) | | < 0.001 | 0.19 (0.10 - 0.33) | 0.35 (0.21 - 0.53) | | 0.57 (0.40 - 0.78) | | 1.13 (0.83 - 1.78) | | < 0.001 | |
| AC | | 1.88 ± 0.48 | | 2.80 ± 0.59 | 3.47 ± 0.69 | 4.61 ± 1.13 | | < 0.001 | 2.02 ± 0.60 | 2.97 ± 0.60 | | 3.83 ± 0.76 | | 5.14 ± 1.46 | | < 0.001 | |
| VFO (%) | | 45 (16.1%) | | 65 (22.5%) | 99 (35.0%) | 125 (42.5%) | | < 0.001 | 93 (33.1%) | 149 (50.2%) | | 188 (63.1%) | | 220 (73.1%) | | < 0.001 | |

Note: Data were presented as mean ± SD for normally distributed variables, and median (interquartile ranges) for abnormal distributions. Analysis of variance test was performed for multiple comparisons of normally distributed data, and Kruskal–Wallis test for abnormal distributions. Categorical variables were presented as percentage (%) and were compared by Chi-square test. Statistical differences were defined by p value (two-tailed) less than 0.05.

Abbreviations: VFA, visceral fat area; BMI, body mass index; SFA, subcutaneous fat area; SBP, systolic blood pressure; DBP, diastolic blood pressure; TC, total cholesterol; TG, triglyceride; HDL-c, high-density lipoprotein cholesterol; LDL-c, low-density lipoprotein cholesterol; FPG, fasting plasma glucose; HbA1c, glycated hemoglobin; AST, aspartate aminotransferase; ALT, alanine aminotransferase; GGT, γ-Glutamyl transpeptidase; UA, uric acid; Scr, serum creatinine; Hb, hemoglobin; TG/HDL-c, TG/HDL-c ratio; Non-HDL-c, non-high-density lipoprotein cholesterol; AIP, atherogenic index of plasma; LCI, lipoprotein combine index; PHR, platelet/HDL-ratio; CRI-I, Castelli’s risk index I; CRI-II, Castelli’s risk index II; RC, remnant cholesterol; AC, Atherogenic Coefficient. ACI, the atherogenic combined index

| **Variable** | | **ACI** | **TG** | **HDL-c** | **TG/HDL-c** | **Non-HDL-c** | **AIP** | **LCI** | **CRI-I** | **CRI-II** | **RC** | **Non-HDL/HDL-c** | **LDL-c/HDL-c** | **TC/HDL-c** | **RC/HDL-c** | **AC** |
| --- | --- | --- | --- | --- | --- | --- | --- | --- | --- | --- | --- | --- | --- | --- | --- | --- |
| ACI | Pearson correlation | 1 | 0.858 | -0.562 | 0.816 | 0.678 | 0.916 | 0.814 | 0.861 | 0.655 | 0.771 | 0.861 | 0.655 | 0.861 | 0.760 | 0.861 |
| TG | Pearson correlation | 0.858 | 1 | -0.403 | 0.951 | 0.463 | 0.915 | 0.835 | 0.656 | 0.306 | 0.866 | 0.656 | 0.306 | 0.656 | 0.861 | 0.656 |
| HDL-c | Pearson correlation | -0.562 | -0.403 | 1 | -0.528 | -0.028 | -0.512 | -0.319 | -0.559 | -0.433 | -0.355 | -0.559 | -0.433 | -0.559 | -0.483 | -0.559 |
| TG/HDL-c | Pearson correlation | 0.816 | 0.951 | -0.528 | 1 | 0.365 | 0.923 | 0.788 | 0.694 | 0.322 | 0.835 | 0.694 | 0.322 | 0.694 | 0.913 | 0.694 |
| Non-HDL-c | Pearson correlation | 0.678 | 0.463 | -0.028 | 0.365 | 1 | 0.337 | 0.727 | 0.790 | 0.793 | 0.512 | 0.790 | 0.793 | 0.790 | 0.416 | 0.790 |
| AIP | Pearson correlation | 0.916 | 0.915 | -0.512 | 0.923 | 0.337 | 1 | 0.723 | 0.639 | 0.224 | 0.789 | 0.639 | 0.224 | 0.639 | 0.826 | 0.639 |
| LCI | Pearson correlation | 0.814 | 0.835 | -0.319 | 0.788 | 0.727 | 0.723 | 1 | 0.829 | 0.627 | 0.757 | 0.829 | 0.627 | 0.829 | 0.737 | 0.829 |
| CRI-I | Pearson correlation | 0.861 | 0.656 | -0.559 | 0.694 | 0.790 | 0.639 | 0.829 | 1 | 0.877 | 0.671 | 1.000 | 0.877 | 1.000 | 0.713 | 1.000 |
| CRI-II | Pearson correlation | 0.655 | 0.306 | -0.433 | 0.322 | 0.793 | 0.224 | 0.627 | 0.877 | 1 | 0.264 | 0.877 | 1.000 | 0.877 | 0.288 | 0.877 |
| RC | Pearson correlation | 0.771 | 0.866 | -0.355 | 0.835 | 0.512 | 0.789 | 0.757 | 0.671 | 0.264 | 1 | 0.671 | 0.264 | 0.671 | 0.953 | 0.671 |
| Non-HDL/HDL-c | Pearson correlation | 0.861 | 0.656 | -0.559 | 0.694 | 0.790 | 0.639 | 0.829 | 1.000 | 0.877 | 0.671 | 1 | 0.877 | 1.000 | 0.713 | 1.000 |
| LDL-c/HDL-c | Pearson correlation | 0.655 | 0.306 | -0.433 | 0.322 | 0.793 | 0.224 | 0.627 | 0.877 | 1.000 | 0.264 | 0.877 | 1 | 0.877 | 0.288 | 0.877 |
| TC/HDL-c | Pearson correlation | 0.861 | 0.656 | -0.559 | 0.694 | 0.790 | 0.639 | 0.829 | 1.000 | 0.877 | 0.671 | 1.000 | 0.877 | 1 | 0.713 | 1.000 |
| RC/HDL-c | Pearson correlation | 0.760 | 0.861 | -0.483 | 0.913 | 0.416 | 0.826 | 0.737 | 0.713 | 0.288 | 0.953 | 0.713 | 0.288 | 0.713 | 1 | 0.713 |
| AC | Pearson correlation | 0.861 | 0.656 | -0.559 | 0.694 | 0.790 | 0.639 | 0.829 | 1.000 | 0.877 | 0.671 | 1.000 | 0.877 | 1.000 | 0.713 | 1 |

**APPENDIX TABLE 2︱** Pearson analysis in the male groups.

Note: Correlation coefficients between ACI and different variables were determined by pearson correlation analysis in male groups.

Abbreviations: TG, triglyceride; HDL-c, high-density lipoprotein cholesterol; TG/HDL-c, TG/HDL-c ratio; Non-HDL-c, Non-high-density lipoprotein cholesterol; AIP, atherogenic index of plasma; LCI, lipoprotein combine index; CRI-I, Castelli’s risk index I; CRI-II, Castelli’s risk index II; RC, remnant cholesterol; AC, Atherogenic Coefficient. ACI, the atherogenic combined index.

**APPENDIX TABLE 3 ︱** Pearson analysis in the female group.

| **Variable** |  | **ACI** | **TG** | **HDL-c** | **TG/HDL-c** | **Non-HDL-c** | **AIP** | **LCI** | **CRI-I** | **CRI-II** | **RC** | **Non-HDL/HDL-c** | **LDL-c/HDL-c** | **TC/HDL-c** | **RC/HDL-c** | **AC** |
| --- | --- | --- | --- | --- | --- | --- | --- | --- | --- | --- | --- | --- | --- | --- | --- | --- |
| ACI | Pearson correlation | 1 | 0.842 | -0.554 | 0.799 | 0.643 | 0.858 | 0.812 | 0.847 | 0.715 | 0.722 | 0.847 | 0.715 | 0.847 | 0.735 | 0.847 |
| TG | Pearson correlation | 0.842 | 1 | -0.388 | 0.937 | 0.383 | 0.882 | 0.777 | 0.573 | 0.334 | 0.782 | 0.573 | 0.334 | 0.573 | 0.796 | 0.573 |
| HDL-c | Pearson correlation | -0.554 | -0.388 | 1 | -0.566 | 0.036 | -0.498 | -0.294 | -0.569 | -0.458 | -0.361 | -0.569 | -0.458 | -0.569 | -0.538 | -0.569 |
| TG/HDL-c | Pearson correlation | 0.799 | 0.937 | -0.566 | 1 | 0.254 | 0.933 | 0.697 | 0.621 | 0.358 | 0.751 | 0.621 | 0.358 | 0.621 | 0.870 | 0.621 |
| Non-HDL-c | Pearson correlation | 0.643 | 0.383 | 0.036 | 0.254 | 1 | 0.177 | 0.735 | 0.751 | 0.788 | 0.463 | 0.751 | 0.788 | 0.751 | 0.345 | 0.751 |
| AIP | Pearson correlation | 0.858 | 0.882 | -0.498 | 0.933 | 0.177 | 1 | 0.620 | 0.531 | 0.216 | 0.693 | 0.531 | 0.216 | 0.531 | 0.791 | 0.531 |
| LCI | Pearson correlation | 0.812 | 0.777 | -0.294 | 0.697 | 0.735 | 0.620 | 1 | 0.811 | 0.691 | 0.710 | 0.811 | 0.691 | 0.811 | 0.690 | 0.811 |
| CRI-I | Pearson correlation | 0.847 | 0.573 | -0.569 | 0.621 | 0.751 | 0.531 | 0.811 | 1 | 0.932 | 0.628 | 1.000 | 0.932 | 1.000 | 0.692 | 1.000 |
| CRI-II | Pearson correlation | 0.715 | 0.334 | -0.458 | 0.358 | 0.788 | 0.216 | 0.691 | 0.932 | 1 | 0.334 | 0.932 | 1.000 | 0.932 | 0.384 | 0.932 |
| RC | Pearson correlation | 0.722 | 0.782 | -0.361 | 0.751 | 0.463 | 0.693 | 0.710 | 0.628 | 0.334 | 1 | 0.628 | 0.334 | 0.628 | 0.936 | 0.628 |
| Non-HDL/HDL-c | Pearson correlation | 0.847 | 0.573 | -0.569 | 0.621 | 0.751 | 0.531 | 0.811 | 1.000 | 0.932 | 0.628 | 1 | 0.932 | 1.000 | 0.692 | 1.000 |
| LDL-c/HDL-c | Pearson correlation | 0.715 | 0.334 | -0.458 | 0.358 | 0.788 | 0.216 | 0.691 | 0.932 | 1.000 | 0.334 | 0.932 | 1 | 0.932 | 0.384 | 0.932 |
| TC/HDL-c | Pearson correlation | 0.847 | 0.573 | -0.569 | 0.621 | 0.751 | 0.531 | 0.811 | 1.000 | 0.932 | 0.628 | 1.000 | 0.932 | 1 | 0.692 | 1.000 |
| RC/HDL-c | Pearson correlation | 0.735 | 0.796 | -0.538 | 0.870 | 0.345 | 0.791 | 0.690 | 0.692 | 0.384 | 0.936 | 0.692 | 0.384 | 0.692 | 1 | 0.692 |
| AC | Pearson correlation | 0.847 | 0.573 | -0.569 | 0.621 | 0.751 | 0.531 | 0.811 | 1.000 | 0.932 | 0.628 | 1.000 | 0.932 | 1.000 | 0.692 | 1 |

Note: Correlation coefficients between ACI and different variables were determined by pearson correlation analysis in female groups.

Abbreviations: TG, triglyceride; HDL-c, high-density lipoprotein cholesterol; TG/HDL-c, TG/HDL-c ratio; Non-HDL-c, Non-high-density lipoprotein cholesterol; AIP, atherogenic index of plasma; LCI, lipoprotein combine index; CRI-I, Castelli’s risk index I; CRI-II, Castelli’s risk index II; RC, remnant cholesterol; AC, Atherogenic Coefficient; ACI, the atherogenic combined index.

**APPENDIX TABLE 4︱** Diagnosis of multicollinearity among lipid indices stratified by gender.

|  | **VIF** | |
| --- | --- | --- |
| **Variables** | **Female** | **Male** |
| TG | 92.144 | 95.975 |
| HDL-c | 13.360 | 11.124 |
| TG/HDL-c | 90.453 | 111.802 |
| Non-HDL-c | 57.975 | 54.346 |
| AIP | 114.917 | 129.154 |
| LCI | 16.931 | 16.535 |
| RC | 76.113 | 87.899 |
| LDL-c/HDL-c | 36.693 | 33.866 |
| RC/HDL-c | 97.981 | 115.449 |
| ACI | 165.577 | 186.234 |
| CRI-I | - | - |
| CRI-II | - | - |
| Non-HDL-c/HDL-c | - | - |
| TC/HDL-c | - | - |
| AC | - | - |

Note: Variance Inflation Factor (VIF) is used to diagnose multicollinearity among lipid parameters in males and females. Values of “–” indicate that perfect multicollinearity was detected for these variables.

Abbreviations: TG, triglyceride; HDL-c, high-density lipoprotein cholesterol; TG/HDL-c, TG/HDL-c ratio; Non-HDL-c, Non-high-density lipoprotein cholesterol; AIP, atherogenic index of plasma; LCI, lipoprotein combine index; CRI-I, Castelli’s risk index I; CRI-II, Castelli’s risk index II; RC, remnant cholesterol; ACI, the atherogenic combined index; AC, Atherogenic Coefficient.

**APPENDIX TABLE 5︱**Model Comparison for VFO in Male Groups.

| **Model** | **Variables** | **P** | **OR** | **95.0% CI for OR** | **AIC** | **BIC** |
| --- | --- | --- | --- | --- | --- | --- |
| Model 1 | ACI | <0.001 | 2.051 | 1.585 - 3.946 | 933.86 | 974.01 |
| Model 2 | RC | 0.015 | 1.487 | 1.081 - 2.046 | 943.71 | 983.86 |
| Model 3 | RC/HDL-c | 0.020 | 1.341 | 1.048 - 1.715 | 944.18 | 984.34 |
| Model 4 | LDL-c/HDL-c | 0.003 | 1.288 | 1.092 - 1.520 | 940.57 | 980.73 |
| Model 5 | CRI-II | 0.003 | 1.288 | 1.092 - 1.520 | 940.57 | 980.73 |
| Model 6 | CRI-I | 0.001 | 1.248 | 1.101 - 1.416 | 937.44 | 977.60 |
| Model 7 | Non-HDL-c/HDL-c | 0.001 | 1.248 | 1.101 - 1.416 | 937.44 | 977.60 |
| Model 8 | TC/HDL-c | 0.001 | 1.248 | 1.101 - 1.416 | 937.44 | 977.60 |
| Model 9 | AC | 0.001 | 1.248 | 1.101 - 1.416 | 937.44 | 977.60 |
| Model 10 | Non-HDL-c | 0.007 | 1.223 | 1.057 - 1.415 | 942.44 | 982.59 |
| Model 11 | TG | 0.017 | 1.177 | 1.030 -1.344 | 943.85 | 984.01 |
| Model 12 | TG/HDL-c | 0.023 | 1.119 | 1.015 - 1.234 | 944.49 | 984.64 |
| Model 13 | LCI | 0.010 | 1.007 | 1.002 - 1.013 | 942.85 | 983.01 |
| Model 14 | HDL-c | 0.005 | 0.381 | 0.196 - 0.742 | 934.19 | 984.39 |

Note: VFO was defined as VFA ≥ 100 cm2. By conducting a binary logistic regression to compare the effect values of different models among different models in males.

Abbreviations:

Model 1: age, smoking, drinking, BMI, SFA, SBP, DBP, FPG, HbA1c, AST, ALT, GGT, UA, Scr, Hb , PHR and ACI;

Model 2: age, smoking, drinking, BMI, SFA, SBP, DBP, FPG, HbA1c, AST, ALT, GGT, UA, Scr, Hb , PHR and RC;

Model 3: age, smoking, drinking, BMI, SFA, SBP, DBP, FPG, HbA1c, AST, ALT, GGT, UA, Scr, Hb , PHR and RC/HDL-c;

Model 4: age, smoking, drinking, BMI, SFA, SBP, DBP, FPG, HbA1c, AST, ALT, GGT, UA, Scr, Hb , PHR and LDL/HDL-c;

Model 5: age, smoking, drinking, BMI, SFA, SBP, DBP, FPG, HbA1c, AST, ALT, GGT, UA, Scr, Hb , PHR and CRI-II;

Model 6: age, smoking, drinking, BMI, SFA, SBP, DBP, FPG, HbA1c, AST, ALT, GGT, UA, Scr, Hb , PHR and CRI-I;

Model 7: age, smoking, drinking, BMI, SFA, SBP, DBP, FPG, HbA1c, AST, ALT, GGT, UA, Scr, Hb , PHR and CRI-I;

Model 8: age, smoking, drinking, BMI, SFA, SBP, DBP, FPG, HbA1c, AST, ALT, GGT, UA, Scr, Hb , PHR and TC/HDL-c;

Model 9: age, smoking, drinking, BMI, SFA, SBP, DBP, FPG, HbA1c, AST, ALT, GGT, UA, Scr, Hb , PHR and AC;

Model 10: age, smoking, drinking, BMI, SFA, SBP, DBP, FPG, HbA1c, AST, ALT, GGT, UA, Scr, Hb , PHR and Non-HDL-c;

Model 11: age, smoking, drinking, BMI, SFA, SBP, DBP, FPG, HbA1c, AST, ALT, GGT, UA, Scr, Hb , PHR and TG;

Model 12: age, smoking, drinking, BMI, SFA, SBP, DBP, FPG, HbA1c, AST, ALT, GGT, UA, Scr, Hb , PHR and TG/HDL-c;

Model 13: age, smoking, drinking, BMI, SFA, SBP, DBP, FPG, HbA1c, AST, ALT, GGT, UA, Scr, Hb , PHR and LCI;

Model 14: age, smoking, drinking, BMI, SFA, SBP, DBP, FPG, HbA1c, AST, ALT, GGT, UA, Scr, Hb , PHR and HDL-c;

Variables that were not included in the regression model: AIP.

**APPENDIX TABLE 6︱**Model parameters for VFO in Female Groups.

| **Model** | **Variables** | **P value** | **OR** | **95.0% CI for OR** | **AIC** | **BIC** |
| --- | --- | --- | --- | --- | --- | --- |
| Model | ACI | 0.029 | 1.798 | 1.061 - 3.046 | 890.80 | 925.82 |

Note: VFO was defined as VFA ≥ 100 cm2. By conducting a binary logistic regression to obtain

the effect values of different models among different models in females.

Abbreviations: Model : Age, BMI, SFA, SBP, DBP, FPG, HbA1c, ALT, GGT, UA, and Hb and ACI.

Variables that were not included in the regression model: TG, HDL-c, Platelet, TG/HDL-c, Non-HDL-c, AIP, LCI, PHR, RC, LDL-c/HDL-c, RC/HDL-c, CRI-I, CRI-II, Non-HDL-c, TC/HDL-c, AC
